# Supplementary material
Source: PubMed Central journal article supplement (PMC5352491)

## Supplemental Material

### Identification of the first marine-derived opioid receptor “balanced” agonist with a signaling profile that resembles the endorphins

Tyler A. Johnson,<sup>‡ §\*</sup> Laura Milan-Lobo,<sup>†</sup> Tao Che,<sup>⊥</sup> Madeline Ferwerda,<sup>†</sup> Eptisam Lambo,<sup>§</sup> Nicole L. McIntosh,<sup>§</sup> Fei Li,<sup>†</sup> Li He,<sup>†</sup> Nicholas Lorig-Roach,<sup>‡</sup> Phillip Crews,<sup>‡</sup> and Jennifer L. Whistler<sup>†\*</sup>

<sup>†</sup>*Department of Neurology, University of California, San Francisco, California 94158,*

<sup>‡</sup>*Department of Chemistry & Biochemistry, University of California, Santa Cruz, California 95064,*

<sup>§</sup>*Department of Natural Sciences & Mathematics, Dominican University of California, San Rafael, California 94901,*

<sup>⊥</sup>*National Institute of Mental Health Psychoactive Drug Screening Program, University of North Carolina, Chapel Hill, NC 27514*

#### [Supporting Information]

**Figure S1.** Selected examples of major chemotypes that function as potent mu opioid receptor ( $\mu$ -OR) agonists with significant analgesic activity.

**Figure S2.** <sup>1</sup>H NMR of aaptamine (400 MHz, d-DMSO)

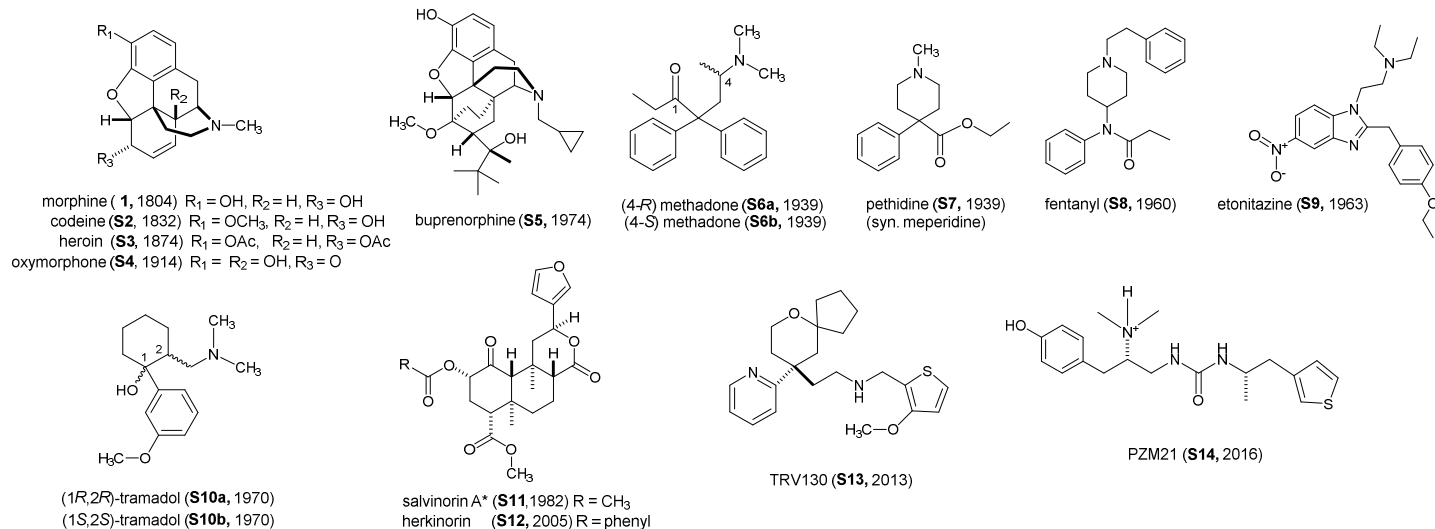

## THE ENDORPHINS

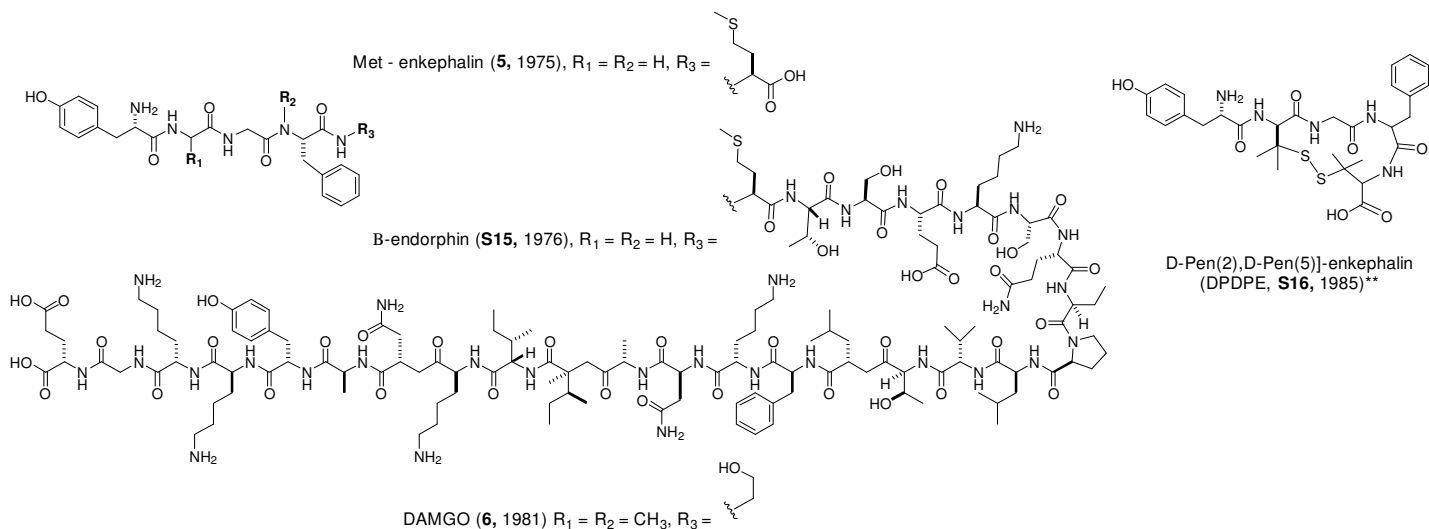

**Figure S1.** Selected examples of major chemotypes (discovery date in parenthesis), that function as potent mu opioid receptor ( $\mu$ -OR) agonists with significant analgesic activity. \*Salvinorin A is a potent and selective kappa opioid receptor ( $\kappa$ -OR) agonist, while herkinorin is a potent  $\mu$ -OR agonist with analgesic activity. \*\*D-Pen(2),D-Pen(5)-enkephalin (DPDPE)\* is a potent and selective  $\delta$ -opioid receptor ( $\delta$ -OR) agonist.

**Figure S2.**  $^1\text{H}$  NMR spectrum of aaptamine, (400 MHz, DMSO) isolated from *A. aaptos*.

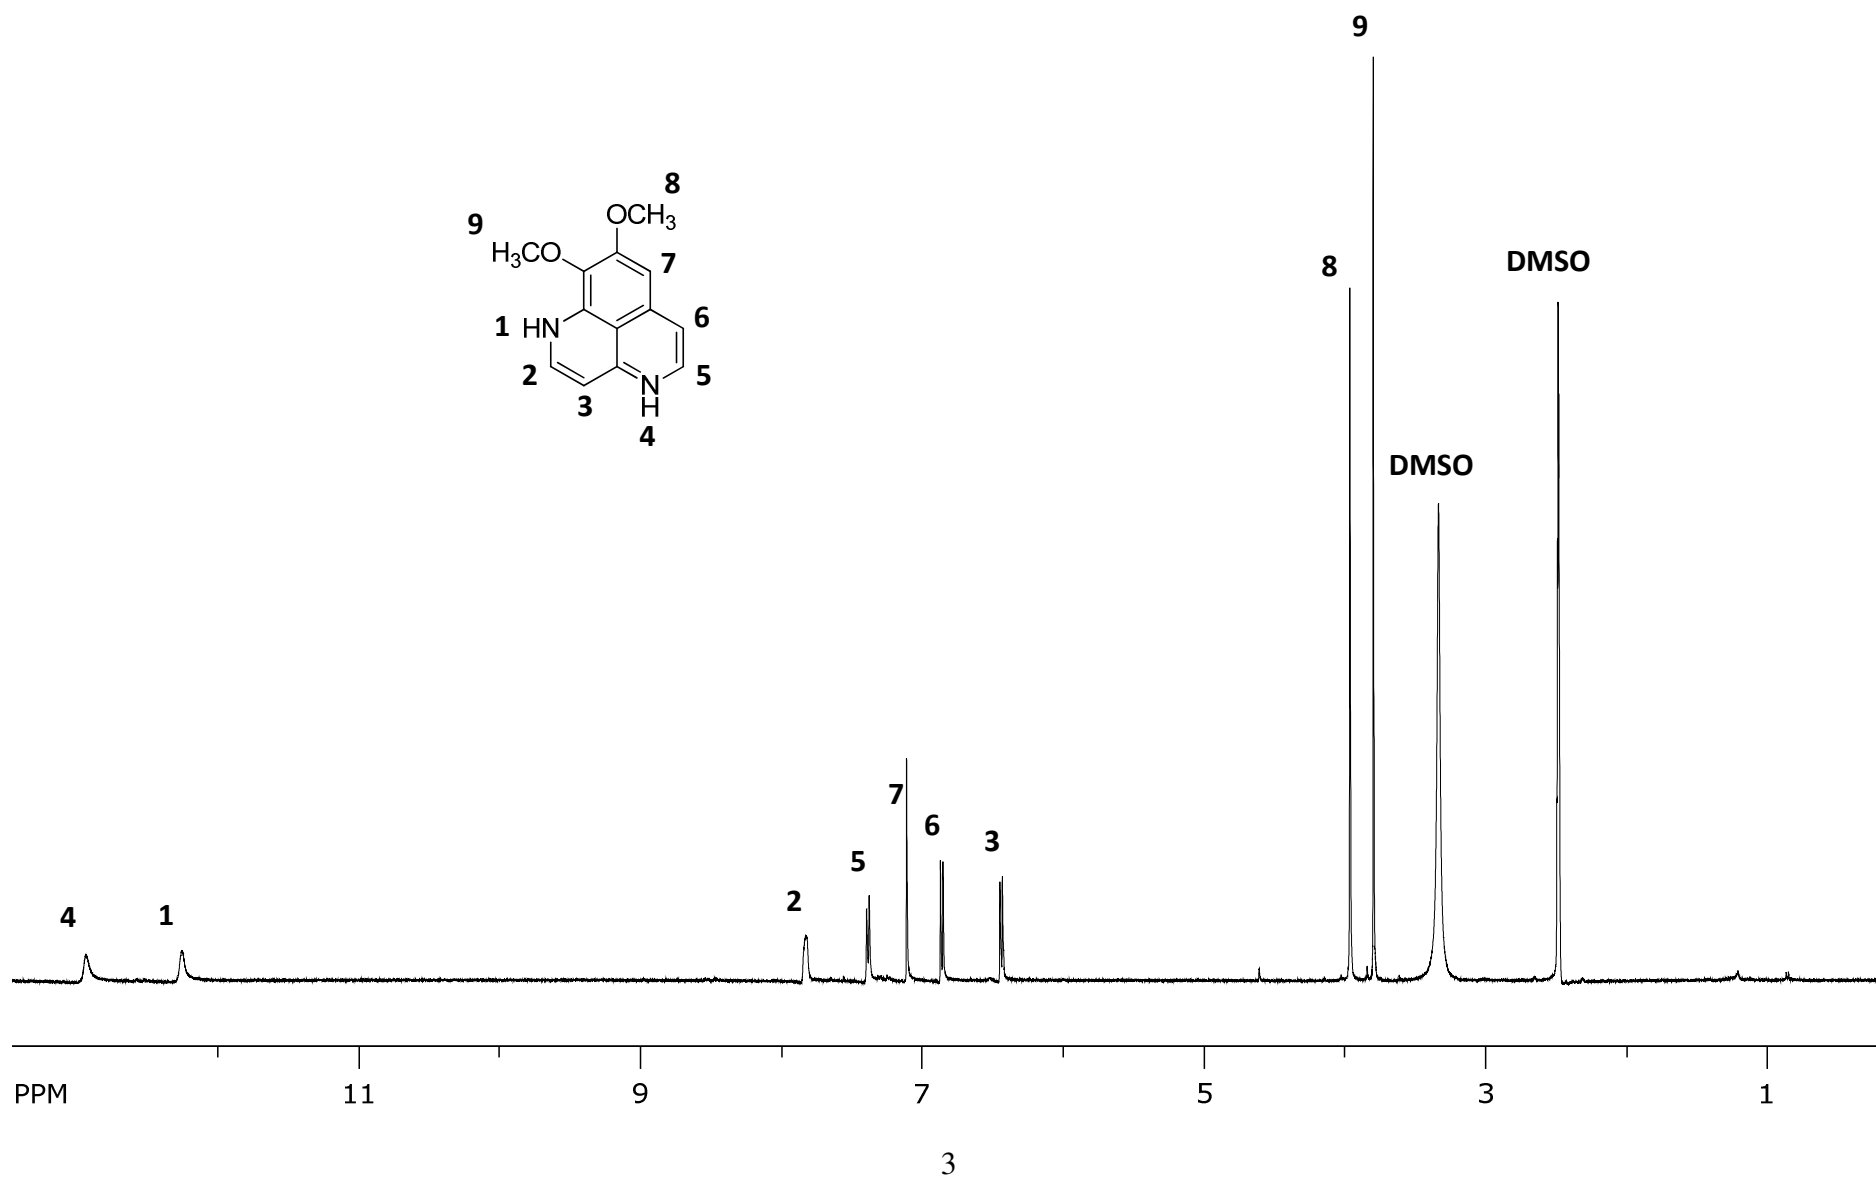

Supplement: NIHMS836716-supplement-SI.pdf [file NIHMS836716-supplement-SI.pdf]
